# Supplementary material for: Odorant Receptor OR2C1 Is an Essential Modulator of Boar Sperm Capacitation by Binding with Heparin
Source: MDPI journal article supplement (doi:10.3390/ijms24021664), 2023-01-14
Supplement: s1 [file s1]

## Supporting Information

### OR2C1 is a novel target binds heparin modulating sperm capacitation

Xiang Yuan<sup>1,†</sup>, Yihan Wang<sup>1,†</sup>, Malik Ahsan Ali<sup>1,2</sup>, Ziyue Qin<sup>1</sup>, Zhihua Guo<sup>1</sup>, Yan Zhang<sup>1</sup>, Ming Zhang<sup>1</sup>, Guangbin Zhou<sup>1</sup>, Jiandong Yang<sup>1</sup>, Lei Chen<sup>1</sup>, Linyuan Shen<sup>1</sup>, Li Zhu<sup>1</sup>, Changjun Zeng<sup>1,\*</sup>

<sup>1</sup> College of Animal Sciences and Technology and Farm Animal Genetic Resources Exploration and Innovation Key Laboratory of Sichuan Province, Sichuan Agricultural University, Chengdu, Sichuan, 611130, China;

<sup>2</sup> Department of Theriogenology, Riphah College of Veterinary Sciences, Lahore, 54000, Punjab, Pakistan;

<sup>†</sup> These authors contributed equally to this work.

\* Correspondence: Changjun Zeng, [zengchj@sicau.edu.cn](mailto:zengchj@sicau.edu.cn)

**Keywords:** Olfactory receptor; OR2C1; Heparin; Boar sperm; Capacitation

## Supplementary Tables

**Table S1:** The homology model (a), ramachandran plot (b) and docked structure of proteins with heparin.

| Protein | Model and Ramachandran plot                                                         | Docked Structures                                                                     |
|---------|-------------------------------------------------------------------------------------|---------------------------------------------------------------------------------------|
| OR2C1   | 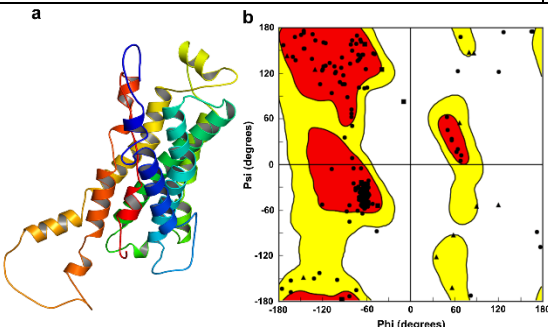   |     |
| OR1L8   |   |    |
| OR2M3   |  |  |
| OR4K13  |  |  |

|        |                                                                                                                                                                                                         |                                                                                       |
|--------|---------------------------------------------------------------------------------------------------------------------------------------------------------------------------------------------------------|---------------------------------------------------------------------------------------|
| OR5V1  | <p><b>a</b></p>  <p><b>b</b></p>      |    |
| OR6S1  | <p><b>a</b></p>  <p><b>b</b></p>      |    |
| OR7A17 | <p><b>a</b></p>  <p><b>b</b></p>    |   |
| OR10Z1 | <p><b>a</b></p>  <p><b>b</b></p>  |  |

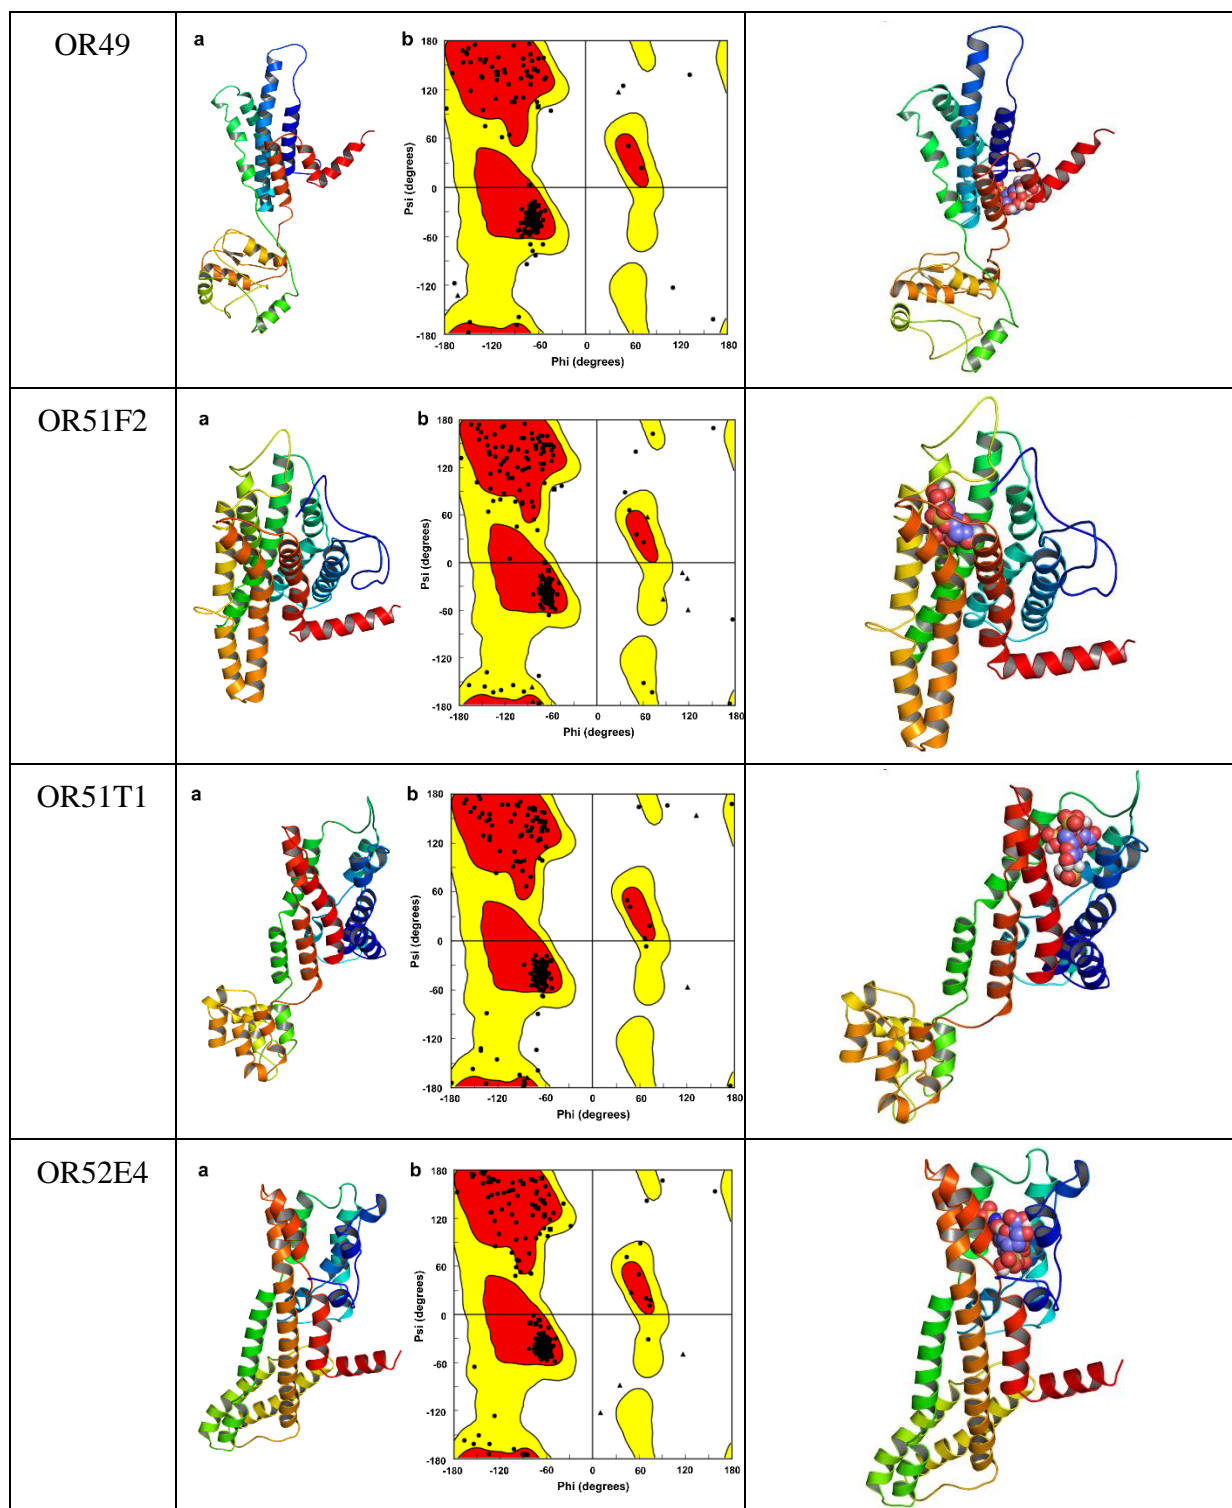

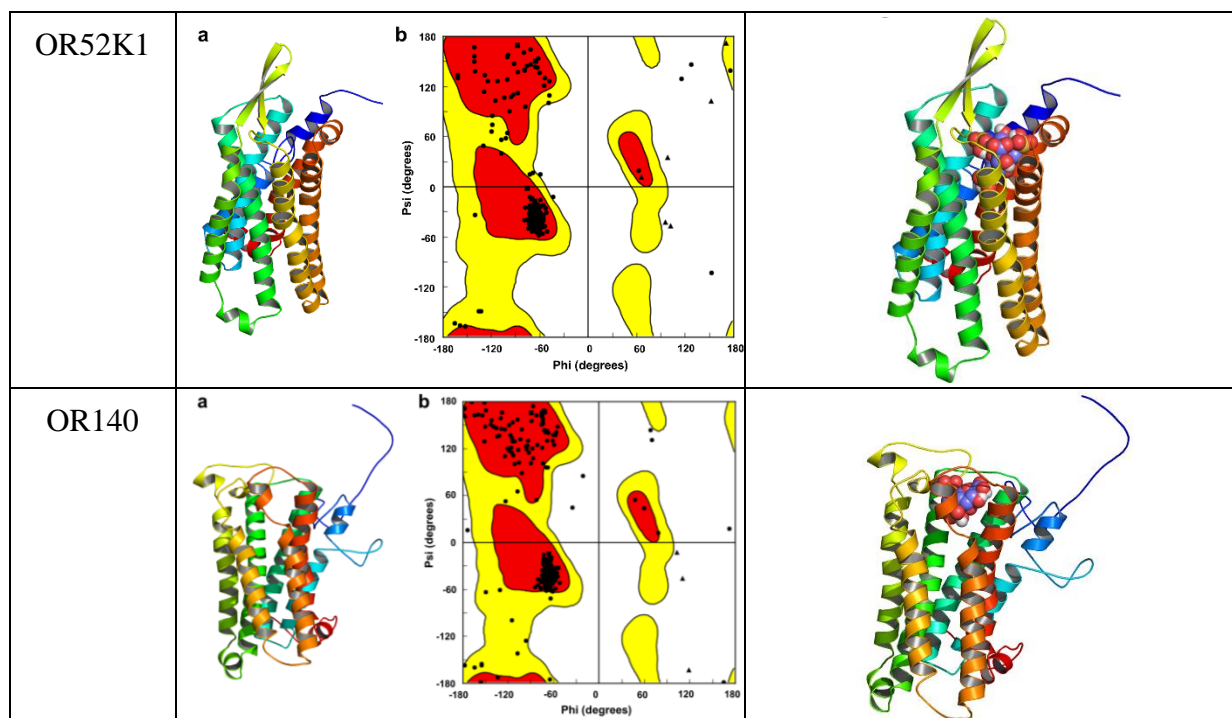

**Table S2:** Docking score and detailed indicators of olfactory receptor with heparin.

| Protein | Docking Score<br>with heparin<br>(kcal/mol) | Intermolecular<br>Energy<br>(kcal/mol) | Electrostatic<br>Energy<br>(kcal/mol) | Internal<br>Energy<br>(kcal/mol) | Predicted<br><i>K<sub>i</sub></i> (μM) |
|---------|---------------------------------------------|----------------------------------------|---------------------------------------|----------------------------------|----------------------------------------|
| OR2C1   | -6.79                                       | -12.16                                 | -4.50                                 | -12.12                           | 10.60                                  |
| OR1L8   | -4.98                                       | -10.35                                 | -0.39                                 | -9.46                            | 222.27                                 |
| OR2M3   | -6.25                                       | -11.62                                 | -1.11                                 | -9.29                            | 26.32                                  |
| OR4K13  | -1.63                                       | -7.00                                  | -0.11                                 | -9.99                            | 64.04                                  |
| OR5V1   | -5.85                                       | -7.22                                  | -0.32                                 | -10.27                           | 44.09                                  |
| OR6S1   | -2.33                                       | -7.70                                  | -0.36                                 | -10.41                           | 19.49                                  |
| OR7A17  | -2.88                                       | -8.25                                  | -0.92                                 | -10.66                           | 7.76                                   |
| OR10Z1  | -4.36                                       | -9.73                                  | -2.78                                 | -11.49                           | 632.86                                 |
| OR49    | -5.53                                       | -10.90                                 | -4.36                                 | -6.29                            | 87.75                                  |
| OR51F2  | -4.81                                       | -10.18                                 | -0.70                                 | -10.32                           | 297.59                                 |
| OR51T1  | -6.23                                       | -11.60                                 | -4.84                                 | -10.56                           | 27.04                                  |
| OR52E4  | -4.22                                       | -9.59                                  | -0.79                                 | -11.61                           | 805.57                                 |
| OR52K1  | -5.86                                       | -11.23                                 | -1.46                                 | -10.89                           | 50.35                                  |
| OR140   | -4.39                                       | -9.76                                  | -3.85                                 | -9.94                            | 602.51                                 |

## Supplementary Figures

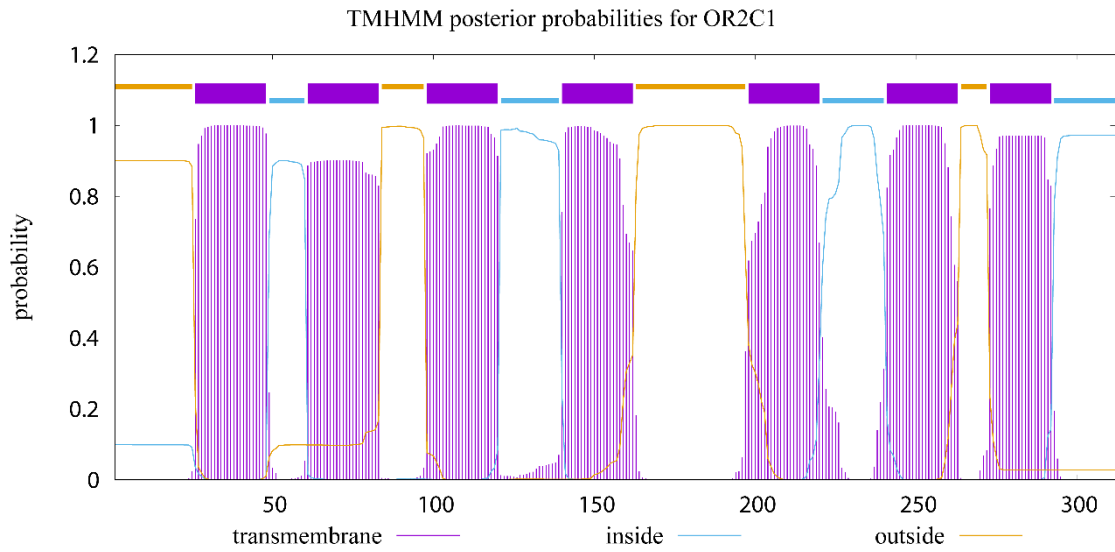

**Figure S1:** TMHMM posterior probabilities for OR2C1. Seven transmembrane regions are clearly indicated as purple bar.

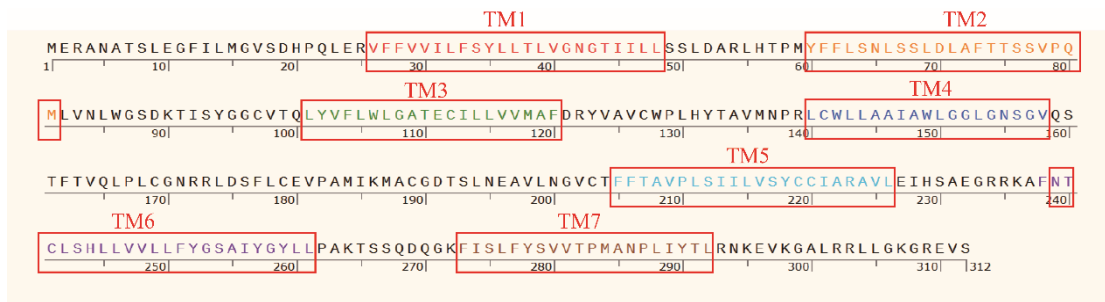

**Figure S2:** The full residue sequence of OR2C1 protein, the different TM region is marked in the different colors and red rectangle box.
